# Supplementary material for: Ba2Zn2B6O13: coplanar [B2O5] in unnoted U-shaped [B6O13] groups achieving large birefringence
Source: Royal Society of Chemistry journal article supplement (doi:10.1039/d2cc03529d), 2022-01-01
Supplement: d2cc03529d1.pdf [file d2cc03529d1.pdf]

## *Supporting Information*

### **Ba<sub>2</sub>Zn<sub>2</sub>B<sub>6</sub>O<sub>13</sub>: Coplanar [B<sub>2</sub>O<sub>5</sub>] in Unnoted U-Shaped [B<sub>6</sub>O<sub>13</sub>] Groups Achieving Large Birefringence**

Rui Zhang,<sup>a</sup> Xin Su,<sup>\*a</sup> Jie Zhang,<sup>b</sup> Dulin Wen<sup>a</sup>

Yineng Huang<sup>\*a</sup>

<sup>a</sup> Xinjiang Laboratory of Phase Transitions and Microstructures in Condensed Matter Physics,  
College of Physical Science and Technology, Yili Normal University, Yining, Xinjiang 835000,  
China.

<sup>b</sup> Department of Physics, Changji University, Changji, Xinjiang 831100, China.

\*Corresponding author E-mail: yn Huang@nju.edu.cn., su xin\_phy@sina.com

## Experimental Section

### Compound Synthesis

BaF<sub>2</sub> (Shanghai Aladdin Bio-Chem Technology Co., Ltd., 99%), BaCO<sub>3</sub> (Tianjin Baishi Chemical Reagent Co., Ltd., 99.9%), ZnF<sub>2</sub> (Shanghai Aladdin Bio-Chem Technology Co., Ltd., 99.9%), Zn(NO<sub>3</sub>)<sub>2</sub>·6H<sub>2</sub>O (Shanghai Aladdin Bio-Chem Technology Co., Ltd., 99.99%) and B<sub>2</sub>O<sub>3</sub> (Shanghai Aladdin Bio-Chem Technology Co., Ltd., 99.9%) are analytical grade and obtained from commercial sources without further purification.

The title crystal was obtained from the high-temperature solution in the open system. First, the mixture of BaF<sub>2</sub>, ZnF<sub>2</sub>, and B<sub>2</sub>O<sub>3</sub> was placed in the platinum crucible with a molar ratio of 1 : 2 : 3 (about 3g of total). The temperature was slowly increased from room temperature to 800 °C, and kept at this temperature for 30 h. Then the furnace was cooled down to 600 °C at a rate of 2 °C/h, then lowered to 400 °C at a rate of 5 °C/h, and finally cooled to room temperature using 30 h. Colorless crystals were separated from the crucible for structural characterization.

Polycrystalline sample of Ba<sub>2</sub>Zn<sub>2</sub>B<sub>6</sub>O<sub>13</sub> is synthesized by solid-state reaction technique. All reagents are commercially available in analytical purity. A mixture of BaCO<sub>3</sub>, Zn(NO<sub>3</sub>)<sub>2</sub>·6H<sub>2</sub>O, and B<sub>2</sub>O<sub>3</sub> in the molar ratio of 2 : 2 : 3 was ground and loaded into a platinum crucible. The mixture was preheated at 500 °C for 10 h. Then the temperature was raised to 680 °C and held at that temperature for 20 days with several intermediate grindings and mixings.

### Single Crystal X-ray Diffraction

Ba<sub>2</sub>Zn<sub>2</sub>B<sub>6</sub>O<sub>13</sub> was used for single crystal data collection using a Bruker D8 Venture diffractometer with Mo K $\alpha$  radiation ( $\lambda = 0.71073 \text{ \AA}$ ) and integrated with a SAINT program.<sup>1</sup> The OLEX2 system was used to solve and refine the crystal structure.<sup>2</sup> The structure was solved by direct methods, and all of the atoms were refined using full-matrix least-squares techniques with an-isotropic thermal parameters and finally converged for  $F_o^2 \geq 2\sigma(F_o^2)$ . The structure was checked for missing symmetry element with PLATON.<sup>3</sup> The information including crystal data and structural refinements is summarized in Table S1, the atomic coordinates and the equivalent isotropic displacement parameters are given in Table S2 in the Supporting Information (SI).

### Powder X-ray Diffraction

Powder XRD data of polycrystalline samples were obtained on a Bruker D2 PHASER diffractometer with Cu K $\alpha$  radiation ( $\lambda = 1.5418 \text{ \AA}$ ) at room temperature. The  $2\theta$  range was 10-70° with a step size of 0.02° and a fixed counting time of 1s/step. The diffraction patterns are in good agreement with the calculated ones, except for a slight amount of impurities in Ba<sub>2</sub>Zn<sub>2</sub>B<sub>6</sub>O<sub>13</sub> (Figure S3).

### Thermal Analysis.

The circular thermal gravimetric (TG) and differential scanning calorimetry (DSC) analyses of Ba<sub>2</sub>Zn<sub>2</sub>B<sub>6</sub>O<sub>13</sub> were investigated using a simultaneous Netzsch STA 449C

thermal analyzer instrument at a heating rate of 5 °C min<sup>-1</sup> in an atmosphere of flowing N<sub>2</sub> from 40 to 1000 °C.

### **Infrared Spectroscopy**

IR spectroscopy was carried out on a Shimadzu IR Affinity-1 spectrometer in the 500-4000 cm<sup>-1</sup> range. The sample was mixed thoroughly with dried KBr.

### **UV-vis-NIR Diffuse-Reflectance Spectroscopy**

UV-vis-NIR diffuse-reflectance data were collected with a SolidSpec-3700 DUV spectrophotometer in the wavelength range from 190 to 2600 nm. And the reflectance spectrum was converted to absorbance with the Kubelka-Munk remission function.<sup>4</sup>

### **Theoretical Calculations**

First-principles density generalized function theory (DFT) electronic structure calculations of Ba<sub>2</sub>Zn<sub>2</sub>B<sub>6</sub>O<sub>13</sub> were performed with the total energy code CASTEP.<sup>5,6</sup> The exchange-correlation functional and pseudopotential were the GGA with the Perdew-Burke-Ernzerhof (PBE) functional and norm-conserving pseudopotential (NCP).<sup>7,8</sup> The valence electrons of the involved elements were O-2s<sup>2</sup>2p<sup>4</sup>, B-2s<sup>2</sup>2p<sup>1</sup>, Zn-3d<sup>10</sup>4s<sup>2</sup>, and Ba-5s<sup>2</sup>5p<sup>6</sup>6s<sup>2</sup>. The plane-wave cutoff energy was set to 750 eV. The Monkhorst-Pack *k*-point was sampled with a separation of 0.05 Å<sup>-1</sup> for self-consistent field: 3 × 3 × 2 for Ba<sub>2</sub>Zn<sub>2</sub>B<sub>6</sub>O<sub>13</sub>.<sup>9</sup> We kept the default values of the CASTEP code on the aspect of the other calculation parameters and convergent criteria. The phonon dispersions were calculated using the linear response method.

### **Thermal Analysis**

As shown in Figure S4a, the TG curve of Ba<sub>2</sub>Zn<sub>2</sub>B<sub>6</sub>O<sub>13</sub> shows no significant change in mass throughout the heating process. There are two obvious heat absorption peaks at 790 and 827°C, suggesting that Ba<sub>2</sub>Zn<sub>2</sub>B<sub>6</sub>O<sub>13</sub> maybe an incongruent compound. To further verify the melting behavior of Ba<sub>2</sub>Zn<sub>2</sub>B<sub>6</sub>O<sub>13</sub>, we placed the powder of Ba<sub>2</sub>Zn<sub>2</sub>B<sub>6</sub>O<sub>13</sub> into a platinum crucible and heated it to 820 °C for 20 h; then it was slowly cooled to room temperature. The powder XRD pattern of the recrystallized powder was different from the calculated one (Figure S4b), which further indicates that Ba<sub>2</sub>Zn<sub>2</sub>B<sub>6</sub>O<sub>13</sub> is an incongruent melting compound.

**Table S1.** Crystal data and structure refinement for Ba<sub>2</sub>Zn<sub>2</sub>B<sub>6</sub>O<sub>13</sub>.

|                                                                                                                                                    |                                                                  |
|----------------------------------------------------------------------------------------------------------------------------------------------------|------------------------------------------------------------------|
| Empirical formula                                                                                                                                  | Ba <sub>2</sub> Zn <sub>2</sub> B <sub>6</sub> O <sub>13</sub>   |
| Formula weight                                                                                                                                     | 678.28                                                           |
| Crystal system, space group                                                                                                                        | triclinic, $P\bar{1}$                                            |
| <i>a</i> (Å)                                                                                                                                       | 6.9742 (4), $\alpha = 93.645(2)$                                 |
| <i>b</i> (Å)                                                                                                                                       | 7.0347 (4), $\beta = 99.323(2)$                                  |
| <i>c</i> (Å)                                                                                                                                       | 13.2993(8), $\gamma = 119.262(2)$                                |
| Volume (Å <sup>3</sup> )                                                                                                                           | 553.92(6)                                                        |
| Z, Calculated density                                                                                                                              | 2, 4.067 g/cm <sup>3</sup>                                       |
| F(000)                                                                                                                                             | 612.0                                                            |
| Theta range for data collection                                                                                                                    | 3.14 to 55.02                                                    |
| Index ranges                                                                                                                                       | $-9 \leq h \leq 9$ , $-9 \leq k \leq 9$ , $-17 \leq l \leq 17$   |
| Reflections collected / unique                                                                                                                     | 20701                                                            |
| Independent reflections                                                                                                                            | 2529 [ $R_{\text{int}} = 0.0569$ , $R_{\text{sigma}} = 0.0301$ ] |
| Data / restraints / parameters                                                                                                                     | 2529/0/209                                                       |
| Goodness-of-fit on $F_o^2$                                                                                                                         | 1.04                                                             |
| Final <i>R</i> indices [ $F_o^2 > 2\sigma(F_o^2)$ ] <sup>a</sup>                                                                                   | $R_1 = 0.024$ , $wR_2 = 0.079$                                   |
| Final <i>R</i> indices (all data)                                                                                                                  | $R_1 = 0.025$ , $wR_2 = 0.0797$                                  |
| <sup>a</sup> $R_1 = \Sigma  F_o  -  F_c  /\Sigma F_o $ and $wR_2 = [\Sigma w(F_o^2 - F_c^2)^2/\Sigma wF_o^4]^{1/2}$ for $F_o^2 > 2\sigma(F_o^2)$ . |                                                                  |

**Table S2.** Atomic coordinates ( $\times 10^4$ ) and equivalent isotropic displacement parameters ( $\text{\AA}^2 \times 10^3$ ) for  $\text{Ba}_2\text{Zn}_2\text{B}_6\text{O}_{13}$ .  $U_{\text{eq}}$  is defined as one-third of the trace the orthogonalised  $U_{ij}$  tensor.

| Atom  | x         | y         | Z         | $U_{\text{eq}}$ | BVS  |
|-------|-----------|-----------|-----------|-----------------|------|
| Ba(1) | 4052.0(4) | 409.8(4)  | 6534.2(2) | 11.96(12)       | 1.93 |
| Ba(2) | 1729.6(5) | 4192.2(5) | 8450.1(2) | 16.88(12)       | 1.90 |
| Zn(1) | 401.7(9)  | 3549.5(9) | 5586.1(4) | 11.00(14)       | 2.05 |
| Zn(2) | 5817.3(9) | 1228.4(9) | 9231.5(4) | 10.70(14)       | 2.09 |
| B(1)  | 10851(9)  | 8033(9)   | 8693(4)   | 11.3(9)         | 3.04 |
| B(2)  | 9331(8)   | 6830(8)   | 6670(4)   | 9.1(9)          | 3.03 |
| B(3)  | 8034(9)   | 9248(8)   | 8512(4)   | 10.6(9)         | 2.96 |
| B(4)  | 6921(9)   | 5494(9)   | 8800(4)   | 13.7(10)        | 3.04 |
| B(5)  | 5134(9)   | 5382(8)   | 6401(4)   | 11.6(9)         | 2.99 |
| B(6)  | 7590(9)   | 9083(8)   | 6043(4)   | 10.6(9)         | 3.03 |
| O(1)  | 12976(6)  | 8643(5)   | 9334(2)   | 12.5(6)         | 2.08 |
| O(2)  | 7438(6)   | 10757(5)  | 8258(3)   | 12.8(6)         | 2.01 |
| O(3)  | 9110(5)   | 6054(5)   | 9057(3)   | 13.1(6)         | 1.93 |
| O(4)  | 5435(6)   | 7309(6)   | 6043(3)   | 15.1(7)         | 2.05 |
| O(5)  | 10133(6)  | 6151(5)   | 5872(2)   | 12.4(6)         | 2.09 |
| O(6)  | 10936(5)  | 7337(5)   | 7637(2)   | 11.2(6)         | 2.00 |
| O(7)  | 9426(5)   | 8930(5)   | 6429(3)   | 12.5(6)         | 1.96 |
| O(8)  | 10227(6)  | 9776(5)   | 8709(3)   | 12.3(6)         | 1.99 |
| O(9)  | 6958(5)   | 5119(5)   | 6701(3)   | 12.0(6)         | 1.89 |
| O(10) | 6343(5)   | 7091(5)   | 8555(3)   | 14.1(7)         | 2.05 |
| O(11) | 3056(6)   | 3751(5)   | 6433(3)   | 14.8(7)         | 2.00 |
| O(12) | 7657(6)   | 10836(6)  | 5668(3)   | 15.3(7)         | 2.02 |
| O(13) | 5206(6)   | 3493(7)   | 8837(4)   | 28.9(10)        | 1.99 |

**Table S3.** The inorganic borates without hydroxyl group, whose FBB contains six B atoms.

| Compound                                                                 | Space Group | B-O framework                                                      | ICSD Code | FBB                                                                                   |
|--------------------------------------------------------------------------|-------------|--------------------------------------------------------------------|-----------|---------------------------------------------------------------------------------------|
| $\text{Ba}_6\text{Al}_4\text{B}_{14}\text{O}_{33}$                       | $P\bar{1}$  | 0D $[\text{B}_6\text{O}_{14}]$ and $[\text{BO}_3]$ groups          | 242282    | 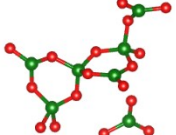   |
| $\text{Bi}_3\text{B}_6\text{O}_{13}(\text{OH})$                          | $P1$        | 3D network formed by $[\text{B}_6\text{O}_{16}]$                   | 172482    |    |
| $\text{CaB}_6\text{O}_{10}$                                              | $P2_1/c$    | 3D network formed by $[\text{B}_6\text{O}_{13}]$                   | 161320    |    |
| $\text{Ca}_2\text{B}_6\text{O}_{11}$                                     | $P2_1/c$    | 3D network formed by $[\text{B}_6\text{O}_{15}]$                   | 23032     |   |
| $(\text{Pb}_4\text{O})\text{Pb}_2\text{B}_6\text{O}_{14}\text{-I}$       | $P1$        | 1D chain formed by $[\text{B}_6\text{O}_{15}]$                     | 239790    |  |
| $(\text{Pb}_4\text{O})\text{Pb}_2\text{B}_6\text{O}_{14}\text{-II}$      | $P\bar{1}$  | 1D chain formed by $[\text{B}_6\text{O}_{15}]$                     | 431518    |  |
| $\text{Pb}_4\text{B}_6\text{O}_{13}$                                     | $Cc$        | 2D layer formed by $[\text{B}_6\text{O}_{14}]$                     | 13422     |  |
| $\text{Na}_2\text{ZnB}_6\text{O}_{11}$                                   | $Cc$        | 2D layer formed by $[\text{B}_6\text{O}_{13}]$                     | 167333    |  |
| $\text{Na}_2\text{Co}_2\text{B}_{12}\text{O}_{21}$                       | $I2/a$      | 3D network formed by $[\text{B}_6\text{O}_{14}]$                   | 281706    |  |
| $\text{Ba}_2\text{KZn}_3(\text{B}_3\text{O}_6)(\text{B}_6\text{O}_{13})$ | $P\bar{1}$  | 0D $[\text{B}_6\text{O}_{13}]$ and $[\text{B}_3\text{O}_6]$ groups | 404485    |  |
| $\text{NH}_4\text{NaB}_6\text{O}_{10}$                                   | $Pa\bar{3}$ | 3D network formed by $[\text{B}_6\text{O}_{13}]$                   | 427197    |  |

---

|                                        |             |                                                               |        |                                                                                     |
|----------------------------------------|-------------|---------------------------------------------------------------|--------|-------------------------------------------------------------------------------------|
| $K_3(B_6O_{10})Cl$ series              | <i>R3m</i>  | 3D network formed by<br>[B <sub>6</sub> O <sub>13</sub> ]     | 262005 |  |
| $Fe_5O_5(B_6O_{10}(OH)_3)(H_2O)_{0.5}$ | <i>P2/c</i> | 1D short chain formed by<br>[B <sub>6</sub> O <sub>13</sub> ] | 249979 |  |

---

**Table S4.** Selected bond distances (Å) and angles (deg.) for Ba<sub>2</sub>Zn<sub>2</sub>B<sub>6</sub>O<sub>13</sub>.

|                      |            |                      |            |
|----------------------|------------|----------------------|------------|
| Ba(1)-O(2) #1        | 2.916(3)   | Zn(2)-O(2)#1         | 1.962(3)   |
| Ba(1)-O(4)#1         | 2.863(3)   | Zn(2)-O(13)          | 1.921(4)   |
| Ba(1)-O(5)#2         | 2.846(3)   | B(1)-O(1)            | 1.425(6)   |
| Ba(1)-O(6)#2         | 2.896(3)   | B(1)-O(3)            | 1.507(6)   |
| Ba(1)-O(7)#2         | 2.840(3)   | B(1)-O(6)            | 1.478(6)   |
| Ba(1)-O(9)           | 2.886(3)   | B(1)-O(8)            | 1.488(6)   |
| Ba(1)-O(11)          | 2.763(3)   | B(2)-O(5)            | 1.434(6)   |
| Ba(1)-O(12)#1        | 2.825(3)   | B(2)-O(6)            | 1.456(6)   |
| Ba(1)-O(12)#3        | 2.879(3)   | B(2)-O(7)            | 1.507(6)   |
| Ba(2)-O(1)#4         | 2.912(3)   | B(2)-O(9)            | 1.501(6)   |
| Ba(2)-O(2)#2         | 2.733(3)   | B(3)-O(2)            | 1.357(6)   |
| Ba(2)-O(3)#4         | 2.896(3)   | B(3)-O(8)            | 1.360(6)   |
| Ba(2)-O(6)#4         | 2.771(3)   | B(3)-O(10)           | 1.407(6)   |
| Ba(2)-O(8)#2         | 2.818(3)   | B(4)-O(3)            | 1.357(6)   |
| Ba(2)-O(10)          | 2.816(3)   | B(4)-O(10)           | 1.406(6)   |
| Ba(2)-O(11)          | 3.021(3)   | B(4)-O(13)           | 1.345(7)   |
| Ba(2)-O(13)          | 2.679(3)   | B(5)-O(4)            | 1.398(6)   |
| Zn(1)-O(5)#3         | 1.958(3)   | B(5)-O(9)            | 1.373(6)   |
| Zn(1)-O(5)#4         | 1.949(3)   | B(5)-O(11)           | 1.349(6)   |
| Zn(1)-O(11)          | 1.940(3)   | B(6)-O(4)            | 1.407(6)   |
| Zn(1)-O(12)#2        | 1.960(3)   | B(6)-O(7)            | 1.355(6)   |
| Zn(2)-O(1)#10        | 1.934(3)   | B(6)-O(12)           | 1.342(6)   |
| Zn(2)-O(1)#2         | 1.962(3)   |                      |            |
| O(4)#1-Ba(1)-O(2)#1  | 69.89(10)  | O(8)#2-Ba(2)-O(1)#4  | 148.50(9)  |
| O(4)#1-Ba(1)-O(6)#2  | 89.92(10)  | O(8)#2-Ba(2)-O(3)#4  | 116.24(10) |
| O(4)#1-Ba(1)-O(9)    | 122.66(10) | O(8)#2-Ba(2)-O(11)   | 94.89(9)   |
| O(4)#1-Ba(1)-O(12)#3 | 78.09(10)  | O(10)-Ba(2)-O(1)#4   | 70.43(9)   |
| O(5)#2-Ba(1)-O(2)#1  | 115.91(9)  | O(10)-Ba(2)-O(3)#4   | 118.00(10) |
| O(5)#2-Ba(1)-O(4)#1  | 71.66(10)  | O(10)-Ba(2)-O(8)#2   | 119.41(9)  |
| O(5)#2-Ba(1)-O(6)#2  | 47.68(9)   | O(10)-Ba(2)-O(11)    | 67.47(10)  |
| O(5)#2-Ba(1)-O(9)    | 158.61(9)  | O(13)-Ba(2)-O(1)#4   | 112.08(12) |
| O(5)#2-Ba(1)-O(12)#3 | 64.89(9)   | O(13)-Ba(2)-O(2)#2   | 119.74(11) |
| O(6)#2-Ba(1)-O(2)#1  | 83.25(9)   | O(13)-Ba(2)-O(3)#4   | 151.68(13) |
| O(7)#2-Ba(1)-O(2)#1  | 128.91(9)  | O(13)-Ba(2)-O(6)#4   | 136.55(11) |
| O(7)#2-Ba(1)-O(4)#1  | 120.20(10) | O(13)-Ba(2)-O(8)#2   | 69.30(11)  |
| O(7)#2-Ba(1)-O(5)#2  | 48.66(9)   | O(13)-Ba(2)-O(10)    | 50.14(10)  |
| O(7)#2-Ba(1)-O(6)#2  | 49.55(9)   | O(13)-Ba(2)-O(11)    | 72.01(12)  |
| O(7)#2-Ba(1)-O(9)    | 115.73(9)  | O(5)#4-Zn(1)-O(5)#3  | 86.10(14)  |
| O(7)#2-Ba(1)-O(12)#3 | 79.98(10)  | O(5)#4-Zn(1)-O(12)#2 | 111.53(15) |
| O(9)-Ba(1)-O(2)#1    | 85.13(9)   | O(5)#3-Zn(1)-O(12)#2 | 103.31(15) |
| O(9)-Ba(1)-O(6)#2    | 138.57(9)  | O(11)-Zn(1)-O(5)#3   | 128.29(15) |



|                       |            |                      |            |
|-----------------------|------------|----------------------|------------|
| O(11)-Ba(1)-O(2)#1    | 120.07(10) | O(11)-Zn(1)-O(5)#4   | 113.68(14) |
| O(11)-Ba(1)-O(4)#1    | 162.17(10) | O(11)-Zn(1)-O(12)#2  | 111.29(14) |
| O(11)-Ba(1)-O(5)#2    | 112.04(10) | O(1)#10-Zn(2)-O(1)#2 | 88.88(14)  |
| O(11)-Ba(1)-O(6)#2    | 105.45(10) | O(1)#10-Zn(2)-O(2)#1 | 114.84(14) |
| O(11)-Ba(1)-O(7)#2    | 66.80(9)   | O(1)#2-Zn(2)-O(2)#1  | 116.40(14) |
| O(11)-Ba(1)-O(9)      | 49.20(9)   | O(13)-Zn(2)-O(1)#2   | 108.40(15) |
| O(11)-Ba(1)-O(2)#1    | 117.24(10) | O(13)-Zn(2)-O(1)#10  | 119.59(18) |
| O(11)-Ba(1)-O(12)#3   | 87.71(10)  | O(13)-Zn(2)-O(2)#1   | 107.86(16) |
| O(12)#1-Ba(1)-O(2)#1  | 74.49(9)   | O(1)-B(1)-O(3)       | 106.3(4)   |
| O(12)#3-Ba(1)-O(2)#1  | 144.77(9)  | O(1)-B(1)-O(6)       | 106.1(4)   |
| O(12)#1-Ba(1)-O(4)#1  | 48.39(10)  | O(1)-B(1)-O(8)       | 115.5(4)   |
| O(12)#1-Ba(1)-O(5)#2  | 112.09(10) | O(6)-B(1)-O(3)       | 108.4(4)   |
| O(12)#3-Ba(1)-O(6)#2  | 111.58(9)  | O(6)-B(1)-O(8)       | 111.2(4)   |
| O(12)#1-Ba(1)-O(6)#2  | 137.27(9)  | O(8)-B(1)-O(3)       | 109.0(4)   |
| O(12)#1-Ba(1)-O(7)#1  | 152.68(10) | O(5)-B(2)-O(6)       | 107.1(4)   |
| O(12)#3-Ba(1)-O(9)    | 100.61(9)  | O(5)-B(2)-O(7)       | 105.5(4)   |
| O(12)#1-Ba(1)-O(9)    | 75.86(10)  | O(5)-B(2)-O(9)       | 112.8(4)   |
| O(12)#1-Ba(1)-O(12)#3 | 73.39(11)  | O(6)-B(2)-O(7)       | 108.3(4)   |
| O(1)#4-Ba(2)-O(11)    | 115.82(9)  | O(6)-B(2)-O(9)       | 112.6(4)   |
| O(2)#2-Ba(2)-O(1)#4   | 120.38(9)  | O(9)-B(2)-O(7)       | 110.2(3)   |
| O(2)#2-Ba(2)-O(3)#4   | 72.94(10)  | O(2)-B(3)-O(8)       | 121.2(4)   |
| O(2)#2-Ba(2)-O(6)#4   | 101.37(10) | O(2)-B(3)-O(10)      | 119.5(4)   |
| O(2)#2-Ba(2)-O(8)#2   | 50.53(9)   | O(8)-B(3)-O(10)      | 119.4(4)   |
| O(2)#2-Ba(2)-O(10)    | 168.99(10) | O(3)-B(4)-O(10)      | 120.5(4)   |
| O(2)#2-Ba(2)-O(11)    | 106.75(10) | O(13)-B(4)-O(3)      | 123.2(4)   |
| O(3)#4-Ba(2)-O(1)#4   | 47.72(9)   | O(13)-B(4)-O(10)     | 116.0(4)   |
| O(3)#4-Ba(2)-O(11)    | 131.56(9)  | O(9)-B(5)-O(4)       | 119.7(4)   |
| O(6)#4-Ba(2)-O(1)#4   | 48.10(9)   | O(11)-B(5)-O(4)      | 120.4(4)   |
| O(6)#4-Ba(2)-O(3)#4   | 50.56(9)   | O(11)-B(5)-O(5)      | 119.9(4)   |
| O(6)#4-Ba(2)-O(8)#2   | 150.35(10) | O(7)-B(6)-O(4)       | 119.1(4)   |
| O(6)#4-Ba(2)-O(10)    | 87.55(10)  | O(12)-B(6)-O(4)      | 115.9(4)   |
| O(6)#4-Ba(2)-O(11)    | 83.84(9)   | O(12)-B(6)-O(7)      | 125.0(4)   |

Symmetry transformations used to generate equivalent atoms:

|                 |                 |
|-----------------|-----------------|
| #1 +X,-1+Y,+Z   | #2 -1+X,-1+Y,+Z |
| #3 1-X,1-Y,1-Z  | #4 -1+X,+Y,+Z   |
| #10 2-X,1-Y,2-Z |                 |

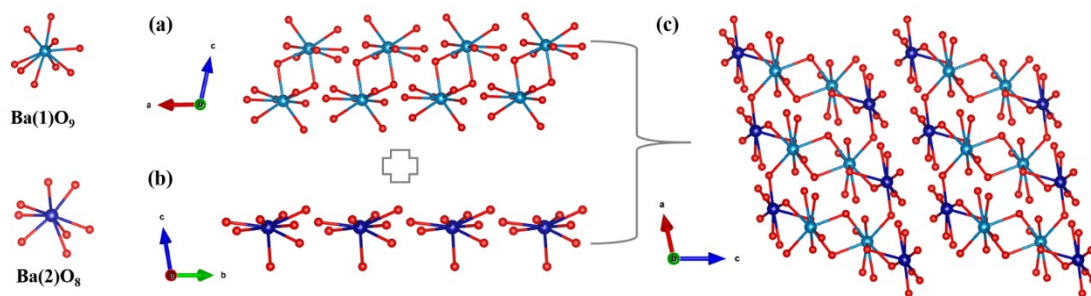

Figure S1. (a) The  $[\text{Ba}(1)_2\text{O}_{16}]$  dimers; (b) isolated  $[\text{Ba}(2)\text{O}_8]$  polyhedra; (c) the  $[\text{Ba}_2\text{O}_{16}]$  layers in  $\text{Ba}_2\text{Zn}_2\text{B}_6\text{O}_{13}$ .

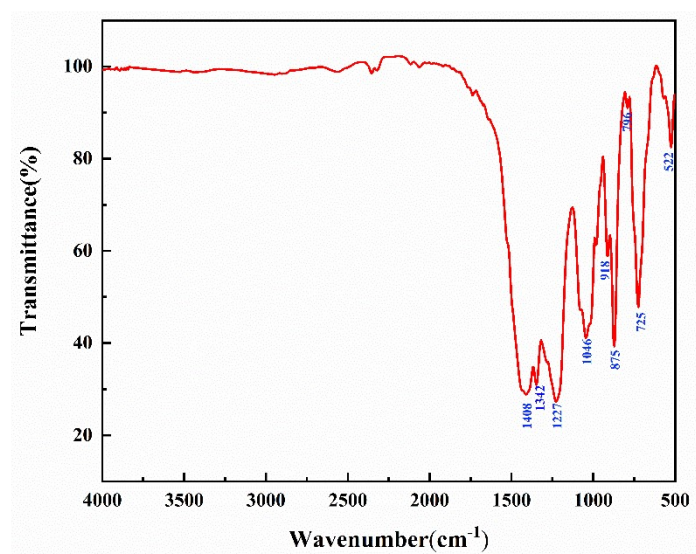

Figure S2. The IR spectrum of Ba<sub>2</sub>Zn<sub>2</sub>B<sub>6</sub>O<sub>13</sub>.

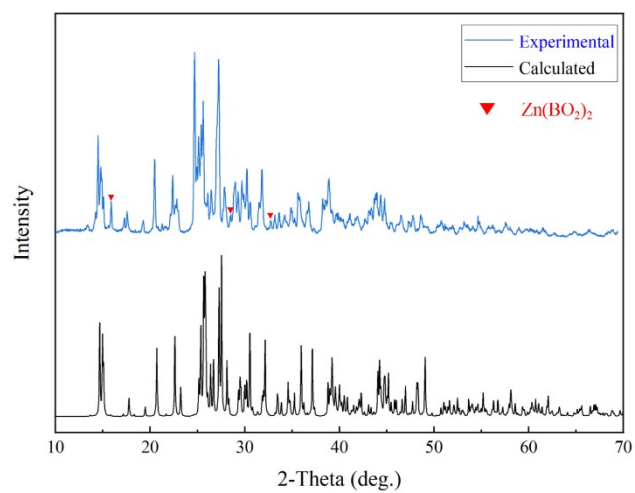

Figure S3. Experimental powder XRD pattern and calculated XRD pattern for  $\text{Ba}_2\text{Zn}_2\text{B}_6\text{O}_{13}$ .

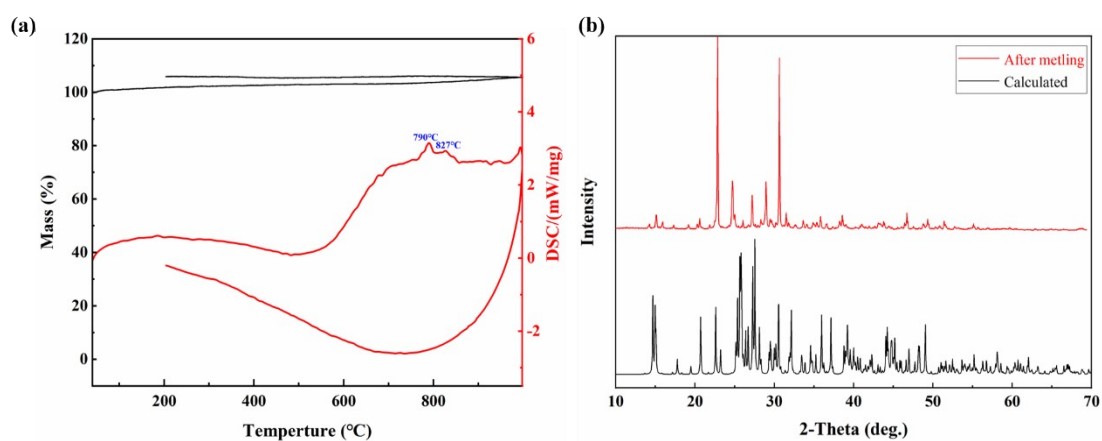

Figure S4. (a) The TG and DSC curves of  $\text{Ba}_2\text{Zn}_2\text{B}_6\text{O}_{13}$ ; (b) XRD patterns of  $\text{Ba}_2\text{Zn}_2\text{B}_6\text{O}_{13}$  powder after melting.

## References

- 1 SAINT, version 7.60A, Bruker Analytical X-ray Instruments, Inc., Madison, WI, 2008.
- 2 O. V. Dolomanov, L. J. Bourhis, R. J. Gildea, J. A. K. Howard and H. Puschmann, OLEX2: A Complete Structure Solution, Refinement and Analysis Program, *J. Appl. Cryst.*, 2009, **42**, 339-341.
- 3 A. L. Spek, Single-Crystal Structure Validation with the Program PLATON, *J. Appl. Cryst.*, 2003, **36**, 7-13.
- 4 P. Kubelka and F. Munk, An Article on Optics of Paint Layers, *FuerTekn. Physik*, 1931, **12**, 593-609.
- 5 M. D. Segall, P. J. D. Lindan, M. J. Probert, C. J. Pickard, P. J. Hasnip, S. J. Clark and M. C. Payne, First-Principles Simulation: Ideas, Illustrations and the CASTEP Code, *J. Phys.: Condens. Matter*, 2002, **14**, 2717-2744.
- 6 S. J. Clark, M. D. Segall, C. J. Pickard, P. J. Hasnip, M. I. J. Probert, K. Refson and M. C. Payne, First Principles Methods Using CASTEP, *Z. Kristallogr.*, 2005, **220**, 567-570.
- 7 A. M. Rappe, K. M. Rabe, E. Kaxiras and J. D. Joannopoulos, Optimized Pseudopotentials, *Phys. Rev. B*, 1990, **41**, 1227-1230.
- 8 J. P. Perdew, K. Burke and M. Ernzerhof, Generalized Gradient Approximation Made Simple, *Phys. Rev. Lett.*, 1996, **77**, 3865-3868.
- 9 H. J. Monkhorst and J. D. Pack, Special Points for Brillouin-Zone Integrations, *Phys. Rev. B*, 1976, **13**, 5188-5192.
